1 **Validating the use of bovine buccal sampling as a proxy for the rumen**  
2 **microbiota using a time course and random forest classification approach**

3

4 Juliana Young,<sup>a</sup> Joseph H. Skarlupka,<sup>b</sup> Rafael Tassinari Resende,<sup>c</sup> Amelie Fischer,<sup>d</sup> Kenneth F.  
5 Kalscheur,<sup>a</sup> Jennifer C. McClure,<sup>a</sup> John B. Cole,<sup>c</sup> Garret Suen,<sup>b</sup> Derek M. Bickhart<sup>a#</sup>

6 <sup>#</sup>Address correspondence to Derek Bickhart, [derek.bickhart@usda.gov](mailto:derek.bickhart@usda.gov).

7 <sup>a</sup>US Dairy Forage Research Center, USDA-Agricultural Research Service, Madison,  
8 Wisconsin, USA

9 <sup>b</sup>Department of Bacteriology, University of Wisconsin, Madison, Wisconsin, USA

10 <sup>c</sup>School of Agronomy, Universidade Federal de Goiás (UFG), Goiânia, GO, Brazil

11 <sup>d</sup>Institut de l'élevage, Beaucause, France

12 <sup>e</sup>Animal Genomics and Improvement Laboratory, USDA-Agricultural Research Service,  
13 Beltsville, Maryland, USA

14

15 **Running head:** Buccal swabbing as a noninvasive proxy for rumen bacteria

16

17

18

19

20

21

22

23

24 **ABSTRACT**

25 Analysis of the cow microbiome, as well as host genetic influences on the establishment and  
26 colonization of the rumen microbiota, is critical for development of strategies to manipulate  
27 ruminal function toward more efficient and environmentally friendly milk production. To this  
28 end, the development and validation of noninvasive methods to sample the rumen microbiota at  
29 a large-scale is required. Here, we further optimized the analysis of buccal swab samples as a  
30 proxy for direct microbial samples of the rumen of dairy cows. To identify an optimal time for  
31 sampling, we collected buccal swab and rumen samples at six different time points relative to  
32 animal feeding. We then evaluated several biases in these samples using a machine learning  
33 classifier (random forest) to select taxa that discriminate between buccal swab and rumen  
34 samples. Differences in the Simpson's diversity, Shannon's evenness and Bray-Curtis  
35 dissimilarities between methods were significantly less apparent when sampling was performed  
36 prior to morning feeding ( $P < 0.05$ ), suggesting that this time point was optimal for representative  
37 sampling. In addition, the random forest classifier was able to accurately identify non-rumen  
38 taxa, including 10 oral and feed-associated taxa. Two highly prevalent ( $> 60\%$ ) taxa in buccal  
39 and rumen samples had significant variance in absolute abundance between sampling methods,  
40 but could be qualitatively assessed via regular buccal swab sampling. This work not only  
41 provides new insights into the oral community of ruminants, but further validates and refines  
42 buccal swabbing as a method to assess the rumen microbiota in large herds.

43

44

45

46

47

48 **IMPORTANCE**

49 The gastrointestinal tract of ruminants harbors a diverse microbial community that coevolved  
50 symbiotically with the host, influencing its nutrition, health and performance. While the  
51 influence of environmental factors on rumen microbes is well-documented, the process by which  
52 host genetics influences the establishment and colonization of the rumen microbiota still needs  
53 to be elucidated. This knowledge gap is due largely to our inability to easily sample the rumen  
54 microbiota. There are three common methods for rumen sampling but all of them present at least  
55 one disadvantage, including animal welfare, sample quality, labor, and scalability. The  
56 development and validation of non-invasive methods, such as buccal swabbing, for large-scale  
57 rumen sampling is needed to support studies that require large sample sizes to generate reliable  
58 results. The validation of buccal swabbing will also support the development of molecular tools  
59 for the early diagnosis of metabolic disorders associated with microbial changes in large herds.

60 **KEYWORDS**

61 Bacteria, oral community, rumen microbiota, buccal swab, machine learning, random forest

62

63

64

65

66

67

68

69

## 70 INTRODUCTION

71 The rumen is a specialized organ found in cattle that hosts a wide diversity of  
72 microorganisms from all three super kingdoms (for a review see (1, 2)). Essential to the digestion  
73 of complex plant polymers by the host, the rumen microbiota consists of several species of  
74 specialized fibrolytic bacteria capable of degrading lignocellulose (3). Microbial changes  
75 following total rumen exchanges (4) and some preliminary genome-wide association data (5, 6)  
76 suggest that the microbial community composition is unique to each individual cow and that the  
77 genetics of the host animal may influence community development/maintenance in the rumen.  
78 Unfortunately, the statistical determination of the extent of host-animal control over this  
79 phenomenon requires a large amount of input data and rumen microbial samples are often quite  
80 laborious to obtain.

81 Methods that directly sample the rumen contents of cattle are the rate-limiting step for  
82 generating a population-scale metric of the rumen microbiome. The gold-standard method for  
83 assessing rumen microbial contents is via rumen cannulation; however, this requires invasive  
84 surgery and cannot be performed on hundreds of cows in a herd. Stomach tubing is another  
85 method of sampling that provides direct access to rumen contents, but this method is labor-  
86 intensive and is uncomfortable for the cow (7, 8) (7). Given the requirements for surgery or  
87 labor-intensive sample collection, respectively, neither method is suitable for the development  
88 of a scalable industrial product. In light of the deficiencies of these methods, buccal swabbing  
89 has been proposed as a proxy for the rumen microbiota (9, 10). The ease of this method,  
90 combined with high-throughput sequencing of the 16S rRNA gene and its lower cost of  
91 implementation, make it a tantalizing option for obtaining population-scale rumen microbial  
92 samples.

93 Buccal swabbing is a noninvasive method that takes advantage of cattle rumination, an  
94 innate behavioral process that characterizes the ruminant clade of mammals (11, 12). During this

95 process, the cow regurgitates, masticates, moistens, and swallows a bolus from the rumen, which  
96 is a mixture of previously ingested plant material that is resistant to prolonged chemical  
97 degradation. This process exposes additional surface area of the digesting plant matter to  
98 continued microbial fermentation (12). However, rumen microbes are not effaced from the  
99 surface of the bolus prior to mastication, and microbial DNA in the oral cavity may constitute a  
100 representative proxy of the rumen microbiota.

101 Indeed, the oral cavity has its own resident microbiota that contains both transient  
102 facultative anaerobes and feed-associated microbes (13, 14) that can be concurrently sampled  
103 during buccal swabbing. The identification and exclusion of these contaminants constitute a pre-  
104 requisite for the use of buccal swabs as proxy for the rumen microbiota (9). In previous studies,  
105 the depletion of these contaminants was performed with mathematical filtering based on the  
106 comparison of the relative abundances of a given taxa between rumen and buccal swab samples  
107 (9, 10). However, these approaches noted the need for further statistical and qualitative validation  
108 for wide-spread adoption of the technique due to confounding factors that could impact microbial  
109 taxa counts (9). This is a necessary step towards the use of buccal swabbing as an independent  
110 method, as future surveys may not always have access to paired rumen samples for calibration.

111 Previous surveys have also not considered sampling time as a potential confounding  
112 factor for interrogating rumen microbial counts via buccal swabbing (15–18). In the case of  
113 sample time, salivary dilution and contamination with feed silage communities could impact  
114 measured community composition and abundance. It is possible that there is a specific window  
115 of time in which buccal swab samples best mirror the rumen contents of the sampled cow. Prior  
116 to its widespread adoption as a suitable proxy for rumen sampling, buccal swabbing data must  
117 be compared in a modeling experiment to identify the magnitude of these biases.

118 In this study, we apply statistical learning methods to buccal swab data obtained from 21  
119 cannulated Holstein cows to identify microbial taxa that are specific to the oral cavity. We

120 hypothesize that the presence of non-rumen bacterial communities and the eventual salivary  
121 dilution of rumen microbial DNA impacts the comparability of buccal swab samples with in-situ  
122 rumen samples. We also tested if buccal swab OTU abundances can be used in regression models  
123 to determine the approximate abundance of rumen microbial genera in individual animals. Our  
124 analysis reveals an additional complexity in the diversity of microbes that colonize the ruminant  
125 gastrointestinal tract, and we expand the future use of buccal swabs in population-scale surveys  
126 of the rumen microbial community.

## 127 MATERIAL AND METHODS

128 **Animal care and use.** All animal procedures were conducted according to Research Animal  
129 Resource Center (RARC) protocol A005902-A02 approved on 07/28/2017 by the University of  
130 Wisconsin-Madison College of Agriculture and Life Sciences Institutional Animal Care and Use  
131 Committee. This work was carried out at the US Dairy Forage Research Center Farm, Prairie du  
132 Sac, WI, from 11/2017 to 06/2019 using a cohort of 21 cannulated lactating Holstein dairy cows  
133 (~2.5 years old) fed a total mixed ration in a free stall barn.

134 **Sampling.** To identify the sampling time at which oral microbiota would best represent the  
135 rumen microbiota, paired oral (Buccal Swab, BS) and ruminal samples (Rumen Anterior Liquid,  
136 RAL; Rumen Anterior Solid, RAS; Rumen Ventral Liquid, RVL; Rumen Ventral Solid, RVS)  
137 were collected from 8 cannulated Holstein cows every 2 hours over the course of 10 hours,  
138 starting 1 hour prior to morning feeding (~ 9 AM) and ending just prior to evening feeding (~ 7  
139 PM), totaling six time points (T1-T6). This dataset is hereafter referred to in the text as the  
140 summer time course (STC; see Table 1).

141 Two other surveys of paired buccal swab and rumen content samplings were conducted on  
142 different animals in the same herd at two other timepoints separated by at least three months  
143 (Table 1). These datasets consist of a spring sampling (SPS; 5 cows) and a summer sampling  
144 (SUS; 8 cows) taken a year prior to the STC dataset. Swabs and rumen contents were processed

145 in the same manner as listed for the time course survey, but samples were collected from animals  
146 four hours after feeding (all cows in SPS) or prior to feeding (all cows in SUS), representing  
147 equivalents to T4 and T1 from the time course trial, respectively. These samples were collected  
148 to provide additional power for training and testing regression models (see Table 1).

149 In all trials, two swabs (Puritan PurFlock Ultra sterile flocked swab with an 80 mm break  
150 point, Puritan Medical Products, Guilford, ME) were inserted in the buccal cavity of each cow  
151 and were gently scraped across the inner side of the right cheek for approximately 10 seconds.  
152 The buccal swabs were placed in a sterile conical tube (15 mL) containing 1 mL of sterile  
153 phosphobuffer saline and stored on ice during sampling. Immediately after buccal swabbing,  
154 rumen contents were collected via the rumen cannula and squeezed through double layers of  
155 cheesecloth to obtain an aliquot of 40mL of rumen liquids and 50 mL of a loosely packed rumen  
156 solid fraction. The solid fraction was squeezed once more to remove all liquids and the residual  
157 solid material was transferred to another container. All samples were stored and transported on  
158 wet ice and stored at -80 °C until processing and DNA extraction.

159 **DNA extraction and sequencing.** Total genomic DNA was extracted from buccal swab, rumen  
160 liquid, and rumen solid samples as previously described (19). Sequencing was performed at the  
161 UW-Madison Biotechnology Center using the 2 × 250 bp paired-end method on an Illumina  
162 MiSeq following manufacturer's guidelines (Illumina, Inc., San Diego, CA, USA). Detailed  
163 methods about and the library preparation and sequencing can be found in Skarlupka et al. (20).

164 **Bioinformatics analysis.** DNA sequences were analyzed using mothur (v1.39.0) (21) as  
165 described previously (22). Coverage was assessed by Good's index (23) and samples that  
166 displayed coverage less than 93% were discarded prior to normalization. To address differences  
167 in sequencing depths, the operational taxonomic unit (OTU) table was normalized by  
168 subsampling sequences to the sample with the smallest number of sequences and then  
169 normalizing across samples to produce equal sequence counts (3,000 sequences per sample). The

170 normalized OTU table was used in further analyses as well as to calculate alpha diversity indices  
171 (i.e., Chao1 (24), Shannon (25), and Simpson (26)), Bray-Curtis dissimilarity index (27) as well  
172 as the relative abundance (reads/total reads in a sample x 100) of OTUs in each sample. Alpha  
173 diversity indices were calculated in mothur (v1.39.0) (21) whereas Bray-Curtis dissimilarity  
174 index was calculated using function `vegdist` available at R package `vegan` (v2.5-6) (28)

175 **Statistical analysis.** All statistical analyses were performed in R (v3.6.1) and source code to  
176 reproduce these analyses is available in Supplementary Materials. Measurements of  $\alpha$ -diversity  
177 (Chao1's richness, Shannon's evenness and Simpson's diversity) and absolute abundance (i.e.,  
178 sequence read counts) of OTUs detected in at least 80% of all samples, were assessed for  
179 normality and were found to follow a non-normal distribution. Differences in the alpha diversity  
180 indices and OTU absolute abundance values were analyzed, respectively, under Gamma and  
181 Poisson distributions, using a repeated-measure generalized linear mixed model estimated via  
182 penalized quasi-likelihood (29):

$$183 \quad Y_i^* = X_i\beta + Z_ib + \varepsilon_i$$

184 where  $Y_i^* = (y_{i,1,1}^*, \dots, y_{i,n_i,1}^*, \dots, y_{i,n_i,m_i}^*)$  is a vector of Gamma- or Poisson-transformed of alpha  
185 diversity indices or OTU counts;  $X_i$  is a design matrix relating individual observations to levels  
186 of fixed effects,  $\beta$  is a vector of fixed effects (i.e., sampling time, sample type, and their  
187 interaction),  $Z_i$  is the incidence-matrix on random effects,  $b$  is the vector of random animal  
188 effects;  $\varepsilon_i$  is a vector of random error terms. The resulting ANOVA P-values were adjusted for  
189 false discovery rate (FDR) using the Benjamini-Hochberg method, and values  $\leq 0.05$  were  
190 considered significant. Pairwise comparisons among the Least Squares Means (LSMEANS)  
191 were performed using Tukey's Honest Significant Difference (Tukey HSD) method. In the  
192 presence of significant interaction effects, the LSMEANS of the sample types were compared  
193 within each sampling time. These analyses were performed using functions available at R



194 package `fitdistrplus` (v1.0-14), `MASS` (v7.3-51.5), `lsmeans` (v2.30-0), and `ggplot2` (v3.2.1) (30–  
195 33).

196 To visually explore the degree of dissimilarity between bacterial composition of oral and  
197 rumen samples collected at six distinct sampling times, Principal Coordinates Analysis (PCoA)  
198 was conducted on the Bray-Curtis distance matrix (27). In addition, Permutational Multivariate  
199 Analysis of Variance (PERMANOVA,  $nperm=1000$ ) (34) with *post hoc* test using Benjamini-  
200 Hochberg correction was performed to assess differences in the composition of bacterial  
201 communities according to sample type, time points and their interaction. These analyses were  
202 performed using functions available in the R packages `ggplot2` (v3.2.1), `vegan` (v2.5-6), and  
203 `EcolUtils` (v0.1) (28, 35, 36) .

204 To identify taxa that discriminate between oral and rumen samples, a Random Forest  
205 classifier was trained on a random selection of 70% (162 samples) of the database composed of  
206 232 samples and 2,031 OTUs and validated using the remaining 30% (70 samples). Only OTUs  
207 with relative abundance  $\geq 0.05\%$  present in at least one sample were included as input. The  
208 number of trees was set to 500, while the number of variables available for splitting at each tree  
209 node (`mtry`) was tuned and accuracy was used to select the optimal model using the largest value.  
210 In addition, to evaluate the capability of our model to predict on independent dataset, we adopted  
211 a repeated k-fold cross validation method (10-fold repeated 3 times). Prediction performance  
212 metrics (i.e., accuracy, sensitivity, specificity, precision and recall) and a confusion matrix were  
213 calculated and summarized by sample type. Finally, the Mean Decrease in Gini (i.e., Gini index)  
214 was used to calculate the variable importance score (VIMP) and select bacterial OTUs that were  
215 most predictive of sample types. To that end, we used the function `varImp` ((37)) that  
216 automatically scales the importance scores to be between 0 and 100. These results were plotted  
217 to show the most important sample type-associated bacterial OTUs with VIMP score  $\geq 50\%$ .

218 These analyses were performed using the R packages randomForest (v4.6-14) and caret (v6.0-  
219 85) (37, 38).

220 In order to evaluate if abundance of oral microbiota can be used to predict the abundance of  
221 rumen microbiota, we tested distinct regressions models (i.e., random forest, Random  
222 generalized linear model, GLMM zero-inflated quasi-Poisson). These analyses were performed  
223 using the R packages MASS (v7.3-51.5), caret (v6.0-85), randomForest (v4.6-14), and  
224 randomGLM (v1.02-1) (37–39).

225 **Data Availability.** The raw sequence reads from all samples analyzed in this study are available  
226 on the NCBI Sequence Read Archive (<https://www.ncbi.nlm.nih.gov/sra/>) under the Bioproject  
227 accession number: PRJNA623113.

## 228 RESULTS

229 **Amplicon sequencing and quality control.** To provide metrics for quality control and optimal  
230 parameter selection, we sampled buccal and rumen contents from several cohorts of cannulated  
231 cattle (Table 1). To test if a difference in rumen sampling site had closer resemblance to swab  
232 samples, rumen strata (solids and liquids) from the anterior and ventral side of the rumen lumen  
233 were simultaneously collected. Samples are hereafter referred to by acronyms that denote their  
234 sample type (BS and R for buccal swab and rumen, respectively), and their location and content  
235 in the case of rumen samples (A, V, S, and L, for anterior, ventral, solid, and liquid, respectively).  
236 For example, the acronym RAL refers to a rumen anterior liquid sample. All samples were  
237 sequenced using the same methods and resulting data were processed using the same pipeline.

238 After sequence quality filtering and normalization, a total of 1,392,036 reads (mean  
239 6,000.155 ± 132.615 SD per sample) and 196,258 OTUs (mean 845.94 ± 199.411 per sample)  
240 were obtained from 232 buccal, rumen solid, and rumen liquid samples in total. Good's coverage  
241 estimation prior to normalization (0.969 ± 0.034 per sample) was deemed adequate and indicated

242 that sequences sufficiently covered the diversity of the bacterial communities in our study. A full  
243 summary of sequencing statistics as well as rarefaction curves divided by sample type and time  
244 point is shown in Fig. S1 and Table S1.

245 Taxonomic composition analysis of the bacterial communities revealed a total of 2,031  
246 OTUs (mean  $112.46 \pm 32.91$  SD) present at relative abundances  $\geq 0.05\%$  and representing 20  
247 phyla, 116 families and 279 genera. The average percentage of sequences unassigned to any  
248 phylum, family, or genus were  $0.19 \pm 0.15$ ,  $1.15 \pm 0.45$ , and  $10.49 \pm 2.69$ , respectively. The most  
249 abundant OTUs, summarized at the phylum, family and genus levels according to sampling time  
250 and type are shown in Fig. S2.

251 **Time course analysis and sampling method comparability.** We first sought to identify the  
252 effects of sampling method on the composition of observed microbial communities in the rumen.  
253 For this analysis, we used paired rumen strata (solid and liquid) and buccal swab samples taken  
254 from the STC cohort (see Table 1) in 2-hour intervals, with the first time point (T1) taken 1 hour  
255 prior to feeding. Rather than seeking a singular optimal time for sampling, we investigated the  
256 possibility that there are periods where the buccal microbial community may be less  
257 representative in terms of species prevalence and relative abundance of the rumen community.

258 Sampling type (i.e., buccal swabbing vs. rumen cannula sampling) had the largest effect  
259 on observed microbial content, as expected. Alpha diversity analysis revealed that Chao1  
260 richness (number of species) varied significantly with sample type ( $P = 0.014$ ) but not sampling  
261 time ( $P = 0.208$ ) or the interaction of these two factors ( $P = 0.091$ ). Shannon's evenness  
262 (population density) and Simpson's diversity (richness and abundance) varied with sample type  
263 ( $P < 0.001$ ;  $P < 0.001$ ), sampling time ( $P = 0.021$ ;  $P = 0.047$ ), and the interaction of these factors  
264 was significant ( $P < 0.001$ ;  $P < 0.001$ ). Regardless of sampling time, buccal swab samples  
265 displayed lower richness (i.e., Chao1) and evenness (i.e., Shannon), but higher diversity (i.e.,  
266 Simpson) when compared to all types of rumen samples (Tukey HSD  $< 0.05$ ). Regardless of

267 sample type, bacterial communities sampled at T3 and T4 displayed the lowest and highest  
268 Shannon's evenness, respectively (Tukey HSD < 0.05). Significant differences in Shannon's  
269 evenness and Simpson's diversity were not observed between others timepoints (Tukey  
270 HSD < 0.05; Table S2). In regard to interaction terms, we observed that buccal swabs collected  
271 at T1 and T4 displayed similar evenness and diversity to all types of rumen samples. In contrast,  
272 buccal swab samples from other time points (T2, T3, T5 and T6) displayed lower evenness but  
273 higher diversity, relative to rumen samples (Tukey HSD < 0.05; Table S2).

274 We used PCoA to visually inspect the similarity of buccal swab samples to contemporary  
275 rumen cannula samples. In general, rumen samples grouped by phase (i.e., L vs S) rather than  
276 location (i.e., A vs V). Additionally, we found that bacterial communities from buccal swab  
277 samples obtained just prior to morning feeding (T1) grouped most closely to rumen solid samples  
278 (RAS + RVS) (Fig. 1). Moreover, ordination plots showed that T3 had the most pronounced  
279 differences between swab and rumen samples. The presence of higher OTU counts of silage-  
280 associated microbes belonging to the *Lactobacilli* in T3 suggest that feed contamination was a  
281 major contributor to this discrepancy (Figs. 2 and S2).

282 PERMANOVA showed that Bray-Curtis dissimilarities in the composition of bacterial  
283 communities were significantly driven by sampling time (R squared= 0.044, P< 0.001), sample  
284 type (R squared= 0.284, P< 0.001), as well as by the interaction of these two factors (R squared=  
285 0.106, P< 0.001). Pairwise comparisons between sample types showed that the composition of  
286 BS samples differs significantly from all types of rumen samples (P=0.010). In addition, we  
287 found that bacterial composition at sampling time T1 was significantly different from T3 (P =  
288 0.015) and T5 (P = 0.045). Lastly, comparisons between sample types within each sampling time  
289 indicates that the composition of bacterial communities in BS samples is similar to those  
290 observed in the RAS samples only at T1 (P = 0.054), confirming the clustering observed in the  
291 PCoA (Fig.1 and Table S3).

292 In addition to compositional dissimilarity, we assessed differences in the absolute  
293 abundance (i.e., read counts) of 277 bacterial OTUs (prevalence of at least 80% of all samples)  
294 in response to sampling time, sample type and the interaction of these two factors (Figs. 5, 6,  
295 and Table S7). Overall, most of the variance in the absolute abundance of bacterial communities  
296 in our study was ascribed to interaction terms given that 240 OTUs varied simultaneously with  
297 sampling time and sample type. Meanwhile, the differences ascribed to main effects were far  
298 less apparent, given the abundance of only 38 and 20 OTUs that varied independently in response  
299 to sample type and sampling time, respectively (Table S7).

300 Comparisons between sample types within each sampling time showed that fewer OTUs  
301 had significantly different absolute abundance between buccal and rumen samples taken at T1  
302 followed by T4 and T6 (Fig. 5A). At these particular time points, the significant differences in  
303 the absolute abundance of OTUs between buccal swab and rumen samples were less pronounced  
304 than observed at other sampling times (Tukey HSD  $\leq 0.05$ ; Fig. 5B). In contrast, greater  
305 significant differences in the absolute abundance of OTUs between BS and all rumen samples  
306 were observed at T3 followed by T5 and T2 (Figs. 5A, 5B, and Table S8).

307 In addition, no significant differences in the absolute abundance of OTUs between RAS  
308 and RVS were observed at T1, T2 and T4. However, some OTUs varied in absolute abundance  
309 between RAL and RVL at others sampling times, mainly at T3 followed by T5 and T6 (Fig. 6A  
310 and Table S8). Pronounced differences in the absolute abundance of several OTUs between  
311 liquids and solids contents were observed at all time points. Specifically, the majority of the  
312 OTUs sampled at T1 and T2 displayed higher absolute abundance in rumen liquids than in rumen  
313 solids (i.e., RAL vs. RAS and RVL vs. RVS) while the opposite was observed at other time  
314 points (Fig. 6A, 6B, and Table S7).

315 Regardless of sample type, comparisons performed between sampling times showed that  
316 the absolute abundance of bacterial OTUs were significantly lower at T3 and T5 in comparison

317 to the other time points, particularly with T4 and T1 (Figure S3 and Table S8). Finally,  
318 comparisons performed between sample types showed that absolute abundance of bacterial  
319 OTUs were significantly lower in buccal swabs than all types of rumen samples (Tukey HSD  $\leq$   
320 0.05), regardless of sampling time. These differences were less apparent when buccal swab and  
321 rumen solids were compared (see Figure S3 and Table S8). However, a few exceptions were  
322 observed for OTUs assigned to *Prevotellaceae\_Ga6A1\_group* and *Succinivibrionaceae\_UCG-*  
323 *002*, whose absolute abundance were significantly higher in BS in comparison to rumen liquids  
324 (RAL or RVL; Tukey HSD  $< 0.05$ ) (Table S8).

325 **Random forest classifier analysis.** We next sought to identify key microbial taxa present in the  
326 oral microbial community that contributed to discrepancies observed in our ordination plots. To  
327 statistically distinguish between taxa that had differences in relative abundance in each sample  
328 type, we trained a random forest classifier model using the STC cohort samples. Random forest  
329 is a supervised learning algorithm which uses ensemble learning method (i.e., combine several  
330 trees base algorithms) to construct better predictive performance (for a review see (38, 40) and  
331 has been widely and successfully employed for classification and regression purposes. In a  
332 classification problem, the algorithm returns a list of predictor variables (i.e., bacterial OTUs)  
333 that can be ranked according to their individual importance (i.e., VIMP score) in classifying the  
334 data.

335 Our preliminary analyses showed that the overall performance of the random forest classifier  
336 using five classification categories for sample type (BS, RAL, RAS, RVL, and RVS) was quite  
337 low (Accuracy 58.6% and Kappa 48.2%), even after estimation and tuning of model hyper-  
338 parameters (Table S4). This result supports the observation of high similarity between bacterial  
339 communities from rumen solids (RAS and RVS) and liquids samples (RAL and RVL) from  
340 different rumen lumen areas as observed in the PCoA (Fig. 1). We found improved classifier  
341 accuracy when rumen samples were merged based on rumen content strata (liquids and solids)

342 into a single type in the training and testing sets (collectively referred to as RL and RS,  
343 respectively). This merger unbalanced our training set by providing a two-fold increase in rumen  
344 categories (RL and RS = 95 samples each), and we thus implemented a re-sampling method for  
345 future model training to prevent misclassification of our minority class (BS = 42 samples). We  
346 tested three additional re-sampling methods (i.e., under-sampling, over-sampling, and Synthetic  
347 Minority Over-sampling Technique, SMOTE) to prevent classification bias towards the majority  
348 classes (41, 42). The results showed that random forest trained with additional re-sampling using  
349 the SMOTE had higher performance metrics than the other methods (Table S5).

350 Our final model was able to predict sample type-associated bacterial features with high accuracy  
351 ( $97.78\% \pm 3.7\%$ ) and Cohen's kappa values ( $96.3\% \pm 5.4\%$ ). Cohen's kappa is a frequently used  
352 statistic to assess the performance of machine learning models under a multi-class classification  
353 problem and or unbalanced data (43, 44). Other performance metrics such as sensitivity,  
354 specificity, precision and recall were also calculated for each sample type and are presented in  
355 Table S5. Additionally, our classifier returned the variable importance score (VIMP), as a  
356 function of the Mean Decrease in Gini, of each bacterial OTU, which can be used to discriminate  
357 between oral and rumen samples (Table S6). Thus, higher values of VIMP score expressed as a  
358 percentage indicate higher feature importance (i.e., bacterial OTU) in discerning between classes  
359 and, in our case, between sample types.

### 360 **OTU categorization based on variable importance estimates.**

361 Bacterial OTUs with high VIMP scores ( $\geq 50\%$  mean decrease Gini) displayed patterns  
362 that allowed for manual categorization. Based on average taxon prevalence per sample type and  
363 sampling time, we categorized these OTUs into three categories: core, oral, and rumen (Table 2,  
364 Fig. 3 and see Table S6 in the supplementary material). The remaining OTUs whose VIMP score  
365 was lower than 50% were also categorized for the sake of completeness but were not analyzed  
366 further (Table S6). The core category consisted of OTUs that displayed moderate to high

367 prevalence ( $\geq 60$  to 100%) in all sample types (both rumen and buccal) consistently across  
368 timepoints. The rumen category was defined as the community well represented (prevalence  
369  $\geq 75\%$ ) in rumen liquids and/or solids, and was underrepresented in buccal swab samples  
370 (prevalence  $< 60\%$ ) at all time points (Fig. 3, Table 2 and Table S6). Finally, the oral group  
371 consisted of OTUs well represented in buccal swab samples (prevalence  $\geq 60\%$ ) but were either  
372 absent or underrepresented in the rumen samples ( $< 60\%$  prevalence) across time points. The oral  
373 group was found to contain silage community microbes (i.e., *Lactobacilli*) at time points where  
374 feed was provided to the animals (e.g., T3, see Fig. 4), further supporting our classification and  
375 the model's accuracy.

376 In the core group, we identified two OTUs (VIMP  $> 80\%$ ) assigned to the genus  
377 *Prevotella\_1* (Fig. 3 and Table 2) that displayed high prevalence in both buccal swab and rumen  
378 (liquid and solid) samples. The absolute abundance of these taxa was significantly lower (Tukey  
379 HSD  $\leq 0.05$ ) in buccal swabs than in rumen samples (Tables S6 and S7). This suggests that these  
380 taxa can be reliably sampled via swabbing but that their absolute abundances are greatly biased  
381 compared to the paired rumen samples.

382 We also identified taxa in the families Neisseriaceae, Pasteurellaceae, Micrococcaceae,  
383 and Planococcaceae, as well as in the genera *Streptococcus*, *Jeotgalicoccus*, and *Bibersteinia*,  
384 which displayed moderate to high VIMP scores ( $\geq 50\%$ ) and were assigned to the oral category.  
385 These taxa were overrepresented in terms of prevalence and abundance in buccal swab samples  
386 and displayed very low or zero abundance in rumen liquid and solid samples (Fig. 3 and Tables  
387 2 and S6). In addition, we observed that several oral taxa (i.e., *Oceanobacillus*, *Lactobacilli*,  
388 *Lachnoclostridium*, *Leuconostoc*, *Rothia*, and *Proteus*) were underrepresented in terms of  
389 abundance and prevalence at specific time points, including T1, T4 and T6, relative to time points  
390 T2, T3 and T5 (Fig. 4 and Table S6).



391 Finally, the classifier also selected rumen strata OTUs that have lower relative abundance  
392 in the buccal swab samples (rumen category). Several were specific to rumen liquids (0405-p-  
393 1088-a5\_gut\_group, *Howardella*, Ruminococcaceaa\_ge, *Synergistes*, Prevotellaceae\_UCG-001,  
394 Rikenellaceae\_RC9\_gut\_group) and others were derived from the rumen solids  
395 (*Ruminococcus\_1*, Prevotellaceae\_UCG-001 and *Oribacterium*) whose overall importance was  
396  $\geq 33\%$  (Fig. 3 and Tables 2 and S6).

397 **Random forest regression analysis.** We next sought to test whether the abundance of OTUs  
398 found in buccal swab samples could be used to predict the abundance of rumen OTUs. We tested  
399 the ability of four linear models (random forest regression, three log-linear models with either a  
400 Poisson distribution, zero inflated, or random generalized linear model (RGLM)) to characterize  
401 the relationship between bacterial OTUs of paired buccal swab and rumen liquid samples. In  
402 order to provide additional data for our training regression models, we incorporated data from  
403 21 cows sampled in two other surveys (Table 1) processed with the same methods used for the  
404 time course study. It is important to note that random forest regression was performed using  
405 sequence relative abundances whereas log-linear models use sequence absolute abundance (i.e.,  
406 number of reads) for each OTU, assuming a Poisson distribution of read counts. Our random  
407 forest and Poisson regression model converged, but exhibited low accuracy in cross-validation  
408 studies as shown by a low coefficient of determination ( $R\text{-Squared} = 0.39 \pm 0.05$ ) and high Root  
409 Mean Square Error ( $RMSE = 0.28 \pm 0.09$ ). We attempted to tune additional parameters in the  
410 random forest model, but were unable to achieve an accuracy  $R\text{-Squared}$  above of  $0.42 \pm 0.07$   
411 on a per-OTU basis. Conversely, zero inflated and RGLM trials failed to converge, despite  
412 several attempts to filter the OTU tables and tune model parameters. These results may be related  
413 to our use of a small dataset as well as the non-linear relationship between the buccal swab and  
414 rumen OTU abundance/counts on a per-sample basis.

415

## 416 DISCUSSION

417 In this study we evaluated the ability of the buccal swabbing method to describe bacterial  
418 communities found in two types of rumen samples taken at six distinct sampling times over the  
419 course of ten hours. Buccal swab samples are an attractive alternative to more labor-intensive  
420 methods of sampling the rumen microbial community, but may suffer from bias due to  
421 contamination by the surrounding oral community (9, 10). We first sought to identify the effect  
422 of sampling time on buccal swab community composition as we hypothesized that animal  
423 rumination patterns and salivary flow may change the relative abundance of key members of the  
424 rumen community.

425 Our time course analysis suggests that there is a small, but statistically significant, effect  
426 of sampling time on the comparisons of several buccal swab microbial taxa with contemporary  
427 rumen samples from the same animal. After dividing sampling times into two-hour intervals, we  
428 sampled buccal contents from each animal just prior to the start of morning feeding (T1), within  
429 regular intervals during and after feeding (T2, T3, T4, and T5), and prior to evening feeding  
430 (T6). We found that the only major outlier was at time point 3 (T3), where the greatest  
431 dissimilarities in the bacterial communities between buccal swabs and rumen samples were  
432 observed. It is possible that additional contamination by the silage microbial community and  
433 increased salivary flow induced by feeding changed the relative abundance of key rumen taxa in  
434 the oral samples of cows sampled at T3. This is evidenced by the presence of *Lactobacilli* from  
435 silage communities in the buccal swabs, but not in the rumen contents (Fig. 2 and 4). Our results  
436 support a hypothesis that there are brief windows of time in which buccal swab data best  
437 represent contemporary rumen microbial data. This means that future surveys will need to record  
438 time of sampling relative to animal feeding in order to standardize results.

439 We also tested the possibility that buccal swab samples may be compositionally similar  
440 to rumen content fractions taken from different positions in the rumen (i.e., Anterior vs Ventral).

441 Our comparisons of sampling time and sample types found no differences between the bacterial  
442 communities of the anterior and ventral rumen microbial communities, which prevented us from  
443 finding such an association (Fig. 1). This result is likely associated with the constant mixing of  
444 rumen contents due to the contractions of the reticulorumen, which would result in  
445 indistinguishable variation in our observed rumen microbial OTU counts (12). This finding  
446 contrasts from previously published work that identified noticeable differences in sample  
447 composition from five different locations of the rumen lumen via PCR DGGE surveys (45). We  
448 therefore cannot rule out the possibility that our sampling and analysis methods could not  
449 identify the small effects that these locations have on the community.

450 We also found greater similarity between bacterial taxa present in buccal swabs and  
451 rumen solids than in rumen liquids (Fig. 1). We suspect that this reflects a key stage of the  
452 rumination process whereby, immediately after regurgitation, the liquid fraction of the bolus is  
453 swallowed (12). It is possible that the bacterial taxa that are predominant in the liquid-phase of  
454 the rumen contents are evacuated from the oral cavity early in the process of rumination. During  
455 mastication of the bolus, bacteria from solid-phase of rumen contents are more likely to adhere  
456 to oral mucosal surfaces and are more likely to be sampled during buccal swabbing.

457 In order to identify non-rumen taxa in buccal swab samples, we employed a machine  
458 learning classifier to assist in the filtering of oral and silage microbial communities in buccal  
459 swab samples. As has been noted previously (9), the presence of the commensal oral microbial  
460 community in buccal swab samples prevents direct comparisons between rumen content samples  
461 and buccal swabs and must be filtered from buccal swab samples prior to analysis using manual  
462 and mathematical methods (9, 10). By using a random forest classifier, we were able to assign  
463 importance estimates to individual microbial taxa based on their use as a feature in our  
464 classification models, as has been done previously (46, 47). The top OTUs, after variable  
465 importance analysis, consisted of microbes that were oral-specific (oral,  $n = 10$ ), rumen-biased

466 (rumen,  $n = 12$ ), and those with high prevalence regardless of sample type but varied based on  
467 relative abundance (core,  $n = 2$ ). These findings support our observations of the influence of  
468 sample type on OTU ~~relative~~ abundance, and also identified members of the oral-microbial  
469 community that were prevalent only in buccal swab samples. In addition, the top OTUs identified  
470 by our VIMP analysis included two members of the *Prevotella*, which were found to vary  
471 substantially between buccal and rumen samples (Table S7). These two OTUs were prevalent in  
472 all samples and at all time points; however, their ~~relative~~ abundance in buccal swabs was lower  
473 than in the rumen samples. These differences were far less apparent at T1, which as just prior to  
474 feeding, than at any other sampling time. This observation of similarity at only one time point  
475 implies that sampling time had a large effect on the estimated ~~relative~~ abundance of this clade,  
476 as confirmed by our ANOVA.

477         The OTUs present within the oral category represent taxa that are poorly represented in  
478 buccal swab samples. Indeed, we identified commensal oral microbes from the genus *Rothia* that  
479 were present only in the buccal swab samples (the oral category). These taxa can be safely  
480 removed from future buccal swab surveys. We also identified several oral taxa (i.e.,  
481 *Lactobacillus*, *Chryseobacterium*, *Burkholderiaceae*, *Oceanobacillus*) that were prevalent at  
482 some time points, and underrepresented or even absent at others (Fig. 4) showing that sampling  
483 time is a critical factor to be considered in future studies. The higher prevalence of these taxa  
484 during (T2) and immediately after (T3) feeding suggests that these sampling times will result in  
485 buccal swab data that is least representative of the rumen contents of the animal.

486         Our use of random forest classifiers suggests that machine-learning methods can be used  
487 to approximate the rumen microbial community at the time of sampling. More accurate  
488 estimation of these communities will be beneficial to rumen microbial ecology experiments that  
489 suffer from low sample counts. However, we were unable to achieve an acceptable rate of error  
490 (measured via residual error of observed and predicted OTU counts) from our regression

491 analysis. We found that multicollinearity of predictors and weak linear association between oral  
492 and rumen OTUs prevented accurate regression. We suspect that other factors (i.e., sampling  
493 time, herd, diet) must be controlled for in the modelling of these data, as evidenced by  
494 significance of sampling time and interaction terms in our PERMANOVA and ANOVA.  
495 Moreover, it is possible that the taxonomic affiliation of our OTU counts could be masking  
496 individual species level abundances that provide far more variance than expected for the  
497 regression model. Similarly, our genus-level assignments could also contain inaccuracies due to  
498 strain abundance differences in the oral cavity vs. the rumen contents.

499 Finally, we cannot rule out the possibility that several OTUs are metabolically active  
500 (i.e., facultative aerobes) in both locations and can proliferate in the oral cavity, thereby creating  
501 a non-linear relationship between their abundance estimates in buccal swabs and rumen contents.  
502 While this presents an impediment to the use of buccal swabs for classical microbial ecology  
503 experiments, we note that buccal swab data is still useful for other associative analysis. The  
504 ability to collect large numbers of samples from a diverse cohort of animals can present an  
505 opportunity for associations of microbial profiles with animal production and performance  
506 metrics including milk production, health and even fertility phenotypes. Such experiments would  
507 benefit from the removal of biases that we identified in this survey.

508 In summary, we have identified significant effects of sampling time and sample type on  
509 the composition of rumen microbial OTU counts derived from buccal swabs and rumen samples.  
510 The buccal swab samples were prone to significant bias based on the time of sampling, with  
511 specific time points showing higher prevalence of the oral- or feed-associated microbial  
512 community than others. For future surveys using buccal swabs as a proxy for rumen microbial  
513 counts, we recommend buccal sampling at least 2 hours prior or four hours after feeding. Our  
514 data also suggests that a portion of the rumen microbial community will remain inaccessible to

515 buccal swab samples; however, this bias may not necessarily impede future association studies  
516 with host animal phenotypic traits.

517

518

## 519 **ACKNOWLEDGMENTS**

520 This research was funded by a USDA Agricultural Research Service (Washington, DC) CRIS  
521 project 5090-31000-026-00-D supporting D.M.B., J.C.M, and J.Y, a USDA ARS CRIS project  
522 5090-31000-025-00D supporting K.F.K, a USDA ARS CRIS project 8042-31000-001-00-D  
523 supporting D.M.B., and a USDA ARS CRIS project 8042-31000-002-00-D supporting J.B.C.  
524 This work was also supported in part by a USDA National Institute of Food and Agriculture  
525 (NIFA), Agricultural and Food Research Initiative (AFRI) Foundation Grant #2019-05592 to  
526 G.S., D.M.B., and J.B.C. J.Y. was also partially supported by a USDA NIFA AFRI Foundation  
527 Grant #2015-67015-22970. J.H.S. was supported by NIH National Research Service Award T32  
528 GM07215.

529 Mention of trade names or commercial products in this article is solely for the purpose of  
530 providing specific information and does not imply recommendation or endorsement by the  
531 USDA. The USDA is an equal opportunity provider and employer.

532 We would like to thank Paul J. Weimer for conversations related to the design of this study, and  
533 for his careful reading and suggestions for this manuscript. The authors declare no conflicts of  
534 interest.

535

536

537

538

539

540

541

542 **REFERENCES**

543 1. Weimer PJ. 2015. Redundancy, resilience, and host specificity of the ruminal microbiota:  
544 Implications for engineering improved ruminal fermentations. *Front Microbiol* 6:296.  
545 <https://doi.org/10.3389/fmicb.2015.00296>.

546

547 2. Bickhart DM, Weimer PJ. 2018. Symposium review: Host–rumen microbe interactions may  
548 be leveraged to improve the productivity of dairy cows. *J Dairy Sci*101:7680–7689.  
549 <https://doi.org/10.3168/jds.2017-13328>.

550

551 3. Neumann AP, Suen G. 2018. The Phylogenomic Diversity of Herbivore-Associated  
552 *Fibrobacter* spp. Is Correlated to Lignocellulose-Degrading Potential. *mSphere* 3(6): e00593-  
553 18. <https://doi.org/10.1128/mSphere.00593-18>.

554

555 4. Weimer PJ, Stevenson DM, Mantovani HC, Man SLC. 2010. Host specificity of the ruminal  
556 bacterial community in the dairy cow following near-total exchange of ruminal contents. *J*  
557 *Dairy Sci*93:5902–5912. <https://doi.org/10.3168/jds.2010-3500>.

558

559 5. Li F, Li C, Chen Y, Liu J, Zhang C, Irving B, Fitzsimmons C, Plastow G, Guan LL. 2019.  
560 Host genetics influence the rumen microbiota and heritable rumen microbial features  
561 associate with feed efficiency in cattle. *Microbiome* 7(1):92. [https://doi.org/10.1186/s40168-  
562 019-0699-1](https://doi.org/10.1186/s40168-019-0699-1).

563

564 6. Wallace RJ, Rooke JA, McKain N, Duthie CA, Hyslop JJ, Ross DW, Waterhouse A, Watson  
565 M, Roehe R. 2015. The rumen microbial metagenome associated with high methane  
566 production in cattle. *BMC Genomics* 16:1–14. <https://doi.org/10.1186/s12864-015-2032-0>.

567

568 7. Henderson G, Cox F, Kittelmann S, Miri VH, Zethof M, Noel SJ, Waghorn GC, Janssen PH.  
569 2013. Effect of DNA extraction methods and sampling techniques on the apparent structure  
570 of cow and sheep rumen microbial communities. *PloS One* 8(9).  
571 <https://doi.org/10.1371/journal.pone.0074787>.

572

573 8. Paz HA, Anderson CL, Muller MJ, Kononoff PJ, Fernando SC. 2016. Rumen Bacterial  
574 Community Composition in Holstein and Jersey Cows Is Different under Same Dietary  
575 Condition and Is Not Affected by Sampling Method. *Front Microbiol* 07:1206.  
576 <https://doi.org/10.3389/fmicb.2016.01206>.

577

- 578 9. Kittelmann S, Kirk MR, Jonker A, McCulloch A, Janssen PH. 2015. Buccal swabbing as a  
579 noninvasive method to determine bacterial, archaeal, and eukaryotic microbial community  
580 structures in the rumen. *Appl Environ Microbiol* 81:7470–7483.  
581 <https://doi.org/10.1128/AEM.02385-15>.
- 582
- 583 10. Tapio I, Shingfield KJ, McKain N, Bonin A, Fischer D, Bayat AR, Vilkki J, Taberlet P,  
584 Snelling TJ, Wallace RJ. 2016. Oral Samples as Non-Invasive Proxies for Assessing the  
585 Composition of the Rumen Microbial Community. *PloS One* 11:e0151220.  
586 <https://doi.org/10.1371/journal.pone.0151220>.
- 587 11. Lindström T, Redbo I. 2000. Effect of feeding duration and rumen fill on behaviour in dairy  
588 cows. *Appl. Anim* 70:83–97. [https://doi.org/10.1016/s0168-1591\(00\)00148-9](https://doi.org/10.1016/s0168-1591(00)00148-9).
- 589
- 590 12. Beauchemin KA. 2018. Invited review: Current perspectives on eating and rumination  
591 activity in dairy cows. *J Dairy Sci* 101:4762–4784. <https://doi.org/10.3168/jds.2017-13706>.
- 592
- 593 13. RamÅ;ak A, Peterka M, Tajima K, Martin JC, Wood J, Johnston MEA, Aminov RI, Flint  
594 HJ, AvguÅ;tin G. 2000. Unravelling the genetic diversity of ruminal bacteria belonging to  
595 the CFB phylum. *FEMS Microbiol Ecol* 33:69–79. [https://doi.org/10.1111/j.1574-  
596 6941.2000.tb00728.x](https://doi.org/10.1111/j.1574-6941.2000.tb00728.x).
- 597
- 598 14. Creevey CJ, Kelly WJ, Henderson G, Leahy SC. 2014. Determining the culturability of the  
599 rumen bacterial microbiome. *Microb Biotechnol* 7:467–479. [https://doi.org/10.1111/1751-  
600 7915.12141](https://doi.org/10.1111/1751-7915.12141).
- 601
- 602 15. Duffield T, Plaizier JC, Fairfield A, Bagg R, Vessie G, Dick P, Wilson J, Aramini J, McBride  
603 B. 2004. Comparison of techniques for measurement of rumen pH in lactating dairy cows. *J*  
604 *Dairy Sci* 87:59–66. [https://doi.org/10.3168/jds.S0022-0302\(04\)73142-2](https://doi.org/10.3168/jds.S0022-0302(04)73142-2).
- 605
- 606 16. Jewell KA, McCormick CA, Odt CL, Weimer PJ, Suen G. 2015. Ruminal bacterial  
607 community composition in dairy cows is dynamic over the course of two lactations and  
608 correlates with feed efficiency. *Appl Environ Microbiol* 81:4697–4710.  
609 <https://doi.org/10.1128/AEM.00720-15>.
- 610
- 611 17. de Mulder T, Goossens K, Peiren N, Vandaele L, Haegeman A, de Tender C, Ruttink T, de  
612 Wiele T van, de Campeneere S. 2016. Exploring the methanogen and bacterial communities  
613 of rumen environments: solid adherent, fluid and epimural. *FEMS Microbiol Ecol*  
614 93(3):fiw251. <https://doi.org/10.1093/femsec/fiw251>.
- 615
- 616 18. Ji S, Zhang H, Yan H, Azarfar A, Shi H, Alugongo G, Li S, Cao Z, Wang Y. 2017.  
617 Comparison of rumen bacteria distribution in original rumen digesta, rumen liquid and solid  
618 fractions in lactating Holstein cows. *J ANIM SCI BIOTECHNO* 8(1):16.  
619 <https://doi.org/doi:10.1186/s40104-017-0142-z>.
- 620
- 621 19. Stevenson DM, Weimer PJ. 2007. Dominance of *Prevotella* and low abundance of classical  
622 ruminal bacterial species in the bovine rumen revealed by relative quantification real-time  
623 PCR. *Appl Microbiol Biotechnol* 75:165–174. [http://dx.doi.org/10.1007/s00253-006-0802-  
624 y](http://dx.doi.org/10.1007/s00253-006-0802-y).
- 625



- 626 20. Skarlupka JH, Kamenetsky ME, Jewell KA, Suen G. 2019. The ruminal bacterial community  
627 in lactating dairy cows has limited variation on a day-to-day basis. *J ANIM SCI*  
628 *BIOTECHNO* 10:66. <https://doi.org/10.1186/s40104-019-0375-0>.  
629
- 630 21. Schloss PD, Westcott SL, Ryabin T, Hall JR, Hartmann M, Hollister EB, Lesniewski RA,  
631 Oakley BB, Parks DH, Robinson CJ, Sahl JW, Stres B, Thallinger GG, van Horn DJ, Weber  
632 CF. 2009. Introducing mothur: Open-source, platform-independent, community-supported  
633 software for describing and comparing microbial communities. *Appl Environ Microbiol*  
634 75:7537–7541. <https://doi.org/10.1128/AEM.01541-09>.  
635
- 636 22. Dill-Mcfarland KA, Breaker JD, Suen G. 2017. Microbial succession in the gastrointestinal  
637 tract of dairy cows from 2 weeks to first lactation. *Sci. Rep.* p 7:40864.  
638 <https://doi.org/10.1038/srep40864>.  
639
- 640 23. Good IJ. 1953. The population frequencies of species and the estimation of population  
641 parameters. *Biometrika* 40:237–264. <https://doi.org/10.2307/2333344>.  
642
- 643 24. Chao A. 1984. Nonparametric estimation of the number of classes in a population. *SCAND*  
644 *J STAT* 1:265–270.  
645
- 646 25. Shannon CE. 1948. A Mathematical Theory of Communication. *Bell System Technical*  
647 *Journal* 27:379–423. <https://doi.org/10.1002/j.1538-7305.1948.tb01338.x>  
648
- 649 26. Simpson EH. 1949. Measurement of Diversity. *Nature* 163:688–688.  
650
- 651 27. Bray JR, Curtis JT. 1957. An Ordination of the Upland Forest Communities of Southern  
652 Wisconsin. *Ecol Monogr* 27:325–349. <https://doi.org/10.2307/1942268>.  
653
- 654 28. Oksanen J, Blanchet FG, Friendly M, Kindt R, Legendre P, McGlinn D, Minchin PR, O’Hara  
655 RB, Simpson GL, Solymos P, Stevens MHH, Szoecs E, Wagner H. 2016. Vegan: an  
656 introduction to ordination. *vegan: Community Ecology Package R package version 24-1*.  
657 <https://CRAN.R-project.org/package=vegan>.  
658
- 659 29. Breslow NE, Clayton DG. 1993. Approximate Inference in Generalized Linear Mixed  
660 Models. *Journal of the American Statistical Association* 88:9.  
661 <https://doi.org/10.2307/2290687>.  
662
- 663 30. Delignette-Muller ML, Dutang C. 2015. fitdistrplus: An R Package for Fitting Distributions.  
664 *J Stat Softw* 64(4), 1-34. <https://doi.org/10.18637/jss.v064.i04>.  
665
- 666 31. Venables WN, Ripley BD. 2002. *Modern applied statistics with S*, 4th ed. Springer, New  
667 York, NY.  
668
- 669 32. Lenth R v. 2016. Least-Squares Means: The R Package lsmeans. *Journal of Statistical*  
670 *Software*, 69(1), 1-33. <https://doi.org/10.18637/jss.v069.i01>.  
671
- 672 33. Wickham H, Chang W. 2016. *ggplot2: Elegant Graphics for Data Analysis*. Springer-Verlag  
673 New York, 2016. <https://cran.r-project.org/web/packages/ggplot2/index.html>.

- 674  
675 34. Anderson MJ. 2001. A new method for non-parametric multivariate analysis of variance.  
676 Austral Ecol 26:32–46. <https://doi.org/10.1111/j.1442-9993.2001.01070.pp.x>  
677
- 678 35. Guillem Salazar. 2018. EcolUtils: Utilities for community ecology analysis. R package  
679 version 0.1. <https://github.com/GuillemSalazar/EcolUtils>.  
680
- 681 36. Liaw A, Wiener M. 2002. Classification and regression by randomForest. R news.2(3):18–  
682 22. <https://cran.r-project.org/web/packages/randomForest>.  
683
- 684 37. Kuhn M. 2020. caret: Classification and Regression Training. R package version 6.0-86.  
685 <https://CRAN.R-project.org/package=caret>.  
686
- 687 38. Breiman L. 2001. Random forests. Mach Learn 45:5–32.  
688 <https://doi.org/10.1023/A:1010933404324>.  
689
- 690 39. Song L, Maintainer PL, Langfelder P. 2015. randomGLM: Random General Linear Model  
691 Prediction. R package version 1.02-1. <https://CRAN.R-project.org/package=randomGLM>.  
692
- 693 40. Chen X, Ishwaran H. 2012. Random forests for genomic data analysis. Genomics 99:323–  
694 329. <https://doi.org/10.1016/j.ygeno.2012.04.003>.  
695
- 696 41. Chawla N v, Bowyer KW, Hall LO, Kegelmeyer WP. 2002. SMOTE: Synthetic Minority  
697 Over-sampling Technique. J ARTIF INTELL RES. <https://doi.org/10.1613/jair.953>.  
698
- 699 42. Blagus R, Lusa L. 2013. SMOTE for high-dimensional class-imbalanced data. BMC  
700 Bioinformatics 14:106. <https://doi.org/10.1186/1471-2105-14-106>.  
701
- 702 43. Landis JR, Koch GG. 1977. The Measurement of Observer Agreement for Categorical Data.  
703 Biometrics 33:159-174. <https://doi.org/10.2307/2529310>.  
704
- 705 44. Landis JR, Koch GG. 1977. An Application of Hierarchical Kappa-type Statistics in the  
706 Assessment of Majority Agreement among Multiple Observers. Biometrics 33:363-374.  
707 <https://doi.org/10.2307/2529786>.  
708
- 709 45. Li M, Penner GB, Hernandez-Sanabria E, Oba M, Guan LL. 2009. Effects of sampling  
710 location and time, and host animal on assessment of bacterial diversity and fermentation  
711 parameters in the bovine rumen. J Appl Microbiol 107:1924–1934.  
712 <https://doi.org/10.1111/j.1365-2672.2009.04376.x>.  
713
- 714 46. Lv X, Chai J, Diao Q, Huang W, Zhuang Y, Zhang N. 2019. The Signature Microbiota Drive  
715 Rumen Function Shifts in Goat Kids Introduced to Solid Diet Regimes. Microorganisms  
716 7:516. <https://doi.org/10.3390/microorganisms7110516>.  
717
- 718 47. Clemmons BA, Martino C, Powers JB, Campagna SR, Voy BH, Donohoe DR, Gaffney J,  
719 Embree MM, Myer PR. 2019. Rumen Bacteria and Serum Metabolites Predictive of Feed  
720 Efficiency Phenotypes in Beef Cattle. Sci Rep 9:19265. <https://doi.org/10.1038/s41598-019-55978-y>.  
721

722

723

724

725

726 **Table 1.** Samples and experimental design.

| Sample set                        | Description                                                      | Sample count | Used in classification? | Used to train regression model? |
|-----------------------------------|------------------------------------------------------------------|--------------|-------------------------|---------------------------------|
| Summer, Time course, Farm 1 (STC) | Six timepoints of sampling paired buccal and rumen contents.     | 8 animals    | Yes                     | Yes                             |
| Spring sampling, Farm 1 (SPS)     | Paired rumen and buccal contents; taken 4 hours after feeding    | 5 animals    | No                      | Yes                             |
| Summer sampling, Farm 2 (SUS)     | Paired rumen and buccal contents; taken 2 hours prior to feeding | 8 animals    | No                      | Yes                             |

727

**Table 2.** Variable importance analysis from the random forest classifier showing the most important bacterial OTUs (importance: scaled Mean Decrease in Gini $\geq$ 50%) that discriminate between buccal swab and rumen samples.

| Taxa                        | Importance | Sample <sup>1</sup> | T1                |                     | T2   |       | T3    |       | T4   |       | T5   |       | T6    |       | Group |
|-----------------------------|------------|---------------------|-------------------|---------------------|------|-------|-------|-------|------|-------|------|-------|-------|-------|-------|
|                             |            |                     | Mean <sup>2</sup> | Prev <sup>3</sup> . | Mean | Prev. | Mean  | Prev. | Mean | Prev. | Mean | Prev. | Mean  | Prev. |       |
| OTU0003-Prevotella_1*       | 100        | BS                  | 1.38              | 100.0               | 0.73 | 75.0  | 0.08  | 62.5  | 1.07 | 100.0 | 0.40 | 87.5  | 0.68  | 100.0 | CORE  |
|                             |            | RL                  | 3.17              | 100.0               | 3.03 | 100.0 | 4.09  | 100.0 | 3.49 | 100.0 | 3.63 | 100.0 | 2.95  | 100.0 |       |
|                             |            | RS                  | 2.12              | 100.0               | 2.06 | 100.0 | 2.13  | 100.0 | 2.41 | 100.0 | 2.36 | 100.0 | 2.61  | 100.0 |       |
| Otu0405-p-1088-a5_gut_group | 96.8       | RS                  | 0.00              | 18.8                | 0.00 | 0.0   | 0.00  | 18.8  | 0.01 | 31.3  | 0.01 | 37.5  | 0.00  | 13.3  | RUMEN |
|                             |            | RL                  | 0.07              | 93.3                | 0.09 | 100.0 | 0.11  | 100.0 | 0.08 | 100.0 | 0.09 | 100.0 | 0.04  | 93.8  |       |
|                             |            | BS                  | 0.01              | 33.3                | 0.00 | 12.5  | 0.00  | 12.5  | 0.01 | 37.5  | 0.00 | 0.0   | 0.00  | 25.0  |       |
| Otu0001-Prevotella_1*       | 87.4       | BS                  | 3.13              | 100.0               | 1.16 | 87.5  | 0.17  | 62.5  | 2.78 | 100.0 | 0.90 | 100.0 | 2.21  | 100.0 | CORE  |
|                             |            | RL                  | 8.08              | 100.0               | 9.27 | 100.0 | 12.13 | 100.0 | 9.15 | 100.0 | 9.83 | 100.0 | 7.97  | 100.0 |       |
|                             |            | RS                  | 5.36              | 100.0               | 5.35 | 100.0 | 5.84  | 100.0 | 6.79 | 100.0 | 6.42 | 100.0 | 6.54  | 100.0 |       |
| Otu0241-Neisseriaceae       | 86.5       | BS                  | 0.97              | 33.3                | 1.13 | 87.5  | 0.16  | 100.0 | 0.18 | 50.0  | 0.18 | 75.0  | 0.08  | 100.0 | ORAL  |
|                             |            | RL                  | 0.00              | 20.0                | 0.00 | 6.3   | 0.00  | 0.0   | 0.00 | 0.0   | 0.00 | 0.0   | 0.00  | 12.5  |       |
|                             |            | RS                  | 0.00              | 0.0                 | 0.00 | 0.0   | 0.00  | 0.0   | 0.00 | 0.0   | 0.00 | 0.0   | 0.00  | 0.0   |       |
| Otu0113-Streptococcus       | 86.1       | BS                  | 0.19              | 50.0                | 0.75 | 75.0  | 0.31  | 100.0 | 0.54 | 62.5  | 0.38 | 87.5  | 10.05 | 100.0 | ORAL  |
|                             |            | RL                  | 0.00              | 6.7                 | 0.00 | 6.3   | 0.00  | 6.3   | 0.00 | 0.0   | 0.00 | 6.3   | 0.00  | 6.3   |       |
|                             |            | RS                  | 0.00              | 0.0                 | 0.00 | 0.0   | 0.00  | 0.0   | 0.00 | 0.0   | 0.00 | 0.0   | 0.00  | 0.0   |       |
| Otu0401-Streptococcus       | 84.9       | BS                  | 0.63              | 50.0                | 0.19 | 87.5  | 0.17  | 100.0 | 0.10 | 37.5  | 0.26 | 75.0  | 0.13  | 100.0 | ORAL  |
|                             |            | RL                  | 0.00              | 0.0                 | 0.00 | 0.0   | 0.00  | 0.0   | 0.00 | 0.0   | 0.00 | 0.0   | 0.00  | 0.0   |       |
|                             |            | RS                  | 0.00              | 0.0                 | 0.00 | 0.0   | 0.00  | 0.0   | 0.00 | 0.0   | 0.00 | 0.0   | 0.00  | 0.0   |       |
| Otu0434-Howardella          | 83.3       | BS                  | 0.01              | 66.7                | 0.00 | 12.5  | 0.00  | 12.5  | 0.01 | 50.0  | 0.01 | 50.0  | 0.00  | 0.0   | RUMEN |
|                             |            | RL                  | 0.07              | 93.3                | 0.09 | 100.0 | 0.12  | 100.0 | 0.06 | 93.8  | 0.05 | 93.8  | 0.04  | 93.8  |       |
|                             |            | RS                  | 0.00              | 0.0                 | 0.00 | 18.8  | 0.00  | 12.5  | 0.01 | 31.3  | 0.00 | 25.0  | 0.00  | 13.3  |       |
| Otu0424-Ruminococcaceae_ge  | 81.3       | BS                  | 0.01              | 50.0                | 0.00 | 12.5  | 0.00  | 0.0   | 0.01 | 37.5  | 0.00 | 12.5  | 0.00  | 0.0   | RUMEN |
|                             |            | RL                  | 0.06              | 93.3                | 0.06 | 87.5  | 0.14  | 93.8  | 0.06 | 81.3  | 0.08 | 100.0 | 0.07  | 93.8  |       |
|                             |            | RS                  | 0.00              | 0.0                 | 0.01 | 31.3  | 0.00  | 25.0  | 0.00 | 18.8  | 0.01 | 31.3  | 0.01  | 33.3  |       |
| Otu0838-Micrococcaceae      | 79         | BS                  | 0.19              | 33.3                | 0.06 | 62.5  | 0.12  | 100.0 | 0.04 | 37.5  | 0.13 | 75.0  | 0.03  | 100.0 | ORAL  |
|                             |            | RL                  | 0.00              | 6.7                 | 0.00 | 0.0   | 0.00  | 0.0   | 0.00 | 0.0   | 0.00 | 0.0   | 0.00  | 0.0   |       |

|                                        |      |    |      |       |      |       |      |       |      |       |      |       |      |       |       |
|----------------------------------------|------|----|------|-------|------|-------|------|-------|------|-------|------|-------|------|-------|-------|
|                                        |      | RS | 0.00 | 0.0   | 0.00 | 0.0   | 0.00 | 0.0   | 0.00 | 0.0   | 0.00 | 0.0   | 0.00 | 0.0   |       |
| Otu0184-Pasteurellaceae                | 76.3 | BS | 0.97 | 50.0  | 2.45 | 75.0  | 0.09 | 100.0 | 0.08 | 37.5  | 0.16 | 75.0  | 0.12 | 100.0 | ORAL  |
|                                        |      | RL | 0.00 | 0.0   | 0.00 | 0.0   | 0.00 | 0.0   | 0.00 | 0.0   | 0.00 | 0.0   | 0.00 | 0.0   |       |
|                                        |      | RS | 0.00 | 0.0   | 0.00 | 6.3   | 0.00 | 0.0   | 0.00 | 0.0   | 0.00 | 0.0   | 0.00 | 6.7   |       |
| Otu0720-Jeotgalicoccus                 | 75   | BS | 0.24 | 50.0  | 0.03 | 87.5  | 0.15 | 100.0 | 0.07 | 50.0  | 0.13 | 75.0  | 0.03 | 100.0 | ORAL  |
|                                        |      | RL | 0.00 | 0.0   | 0.00 | 0.0   | 0.00 | 0.0   | 0.00 | 0.0   | 0.00 | 0.0   | 0.00 | 6.3   |       |
|                                        |      | RS | 0.00 | 0.0   | 0.00 | 0.0   | 0.00 | 0.0   | 0.00 | 0.0   | 0.00 | 0.0   | 0.00 | 0.0   |       |
| Otu0042-Ruminococcaceae_NK4A214_group* | 70.7 | BS | 0.16 | 100.0 | 0.06 | 50.0  | 0.01 | 25.0  | 0.10 | 87.5  | 0.05 | 50.0  | 0.10 | 100.0 | RUMEN |
|                                        |      | RL | 0.59 | 100.0 | 0.80 | 100.0 | 0.99 | 100.0 | 0.72 | 100.0 | 0.81 | 100.0 | 0.55 | 100.0 |       |
|                                        |      | RS | 0.09 | 100.0 | 0.15 | 100.0 | 0.18 | 100.0 | 0.15 | 100.0 | 0.18 | 100.0 | 0.15 | 100.0 |       |
| Otu0322-Streptococcus                  | 66.4 | BS | 0.19 | 50.0  | 0.05 | 62.5  | 0.60 | 75.0  | 0.03 | 62.5  | 0.83 | 75.0  | 1.67 | 75.0  | ORAL  |
|                                        |      | RL | 0.00 | 0.0   | 0.00 | 0.0   | 0.00 | 0.0   | 0.00 | 0.0   | 0.00 | 6.3   | 0.00 | 0.0   |       |
|                                        |      | RS | 0.00 | 0.0   | 0.00 | 0.0   | 0.00 | 0.0   | 0.00 | 0.0   | 0.00 | 0.0   | 0.00 | 0.0   |       |
| Otu0115-Bacteroidales_RF16_group_ge*   | 63.8 | BS | 0.12 | 100.0 | 0.12 | 50.0  | 0.00 | 12.5  | 0.11 | 75.0  | 0.06 | 37.5  | 0.12 | 100.0 | RUMEN |
|                                        |      | RL | 0.21 | 100.0 | 0.27 | 100.0 | 0.33 | 100.0 | 0.33 | 100.0 | 0.32 | 100.0 | 0.39 | 100.0 |       |
|                                        |      | RS | 0.02 | 81.3  | 0.02 | 87.5  | 0.02 | 75.0  | 0.03 | 81.3  | 0.01 | 68.8  | 0.02 | 66.7  |       |
| Otu1233-Planococcaceae                 | 62.3 | BS | 0.03 | 66.7  | 0.03 | 50.0  | 0.03 | 75.0  | 0.06 | 25.0  | 0.07 | 75.0  | 0.05 | 75.0  | ORAL  |
|                                        |      | RL | 0.00 | 0.0   | 0.00 | 0.0   | 0.00 | 0.0   | 0.00 | 0.0   | 0.00 | 0.0   | 0.00 | 0.0   |       |
|                                        |      | RS | 0.00 | 0.0   | 0.00 | 0.0   | 0.00 | 0.0   | 0.00 | 0.0   | 0.00 | 0.0   | 0.00 | 0.0   |       |
| Otu0780-Synergistes                    | 59.8 | BS | 0.00 | 16.7  | 0.00 | 12.5  | 0.00 | 0.0   | 0.01 | 37.5  | 0.00 | 12.5  | 0.00 | 0.0   | RUMEN |
|                                        |      | RL | 0.02 | 80.0  | 0.02 | 87.5  | 0.06 | 93.8  | 0.03 | 75.0  | 0.03 | 87.5  | 0.03 | 75.0  |       |
|                                        |      | RS | 0.00 | 6.3   | 0.00 | 6.3   | 0.00 | 6.3   | 0.00 | 0.0   | 0.00 | 12.5  | 0.00 | 20.0  |       |
| Otu0239-Streptococcus                  | 58.3 | BS | 0.06 | 66.7  | 0.17 | 62.5  | 1.07 | 75.0  | 0.40 | 75.0  | 0.49 | 75.0  | 2.48 | 75.0  | ORAL  |
|                                        |      | RL | 0.00 | 0.0   | 0.00 | 0.0   | 0.00 | 0.0   | 0.00 | 12.5  | 0.00 | 0.0   | 0.00 | 0.0   |       |
|                                        |      | RS | 0.00 | 0.0   | 0.00 | 0.0   | 0.00 | 0.0   | 0.00 | 0.0   | 0.00 | 0.0   | 0.00 | 0.0   |       |
| Otu0443-Prevotellaceae_UCG-001         | 55.4 | BS | 0.02 | 100.0 | 0.01 | 25.0  | 0.00 | 12.5  | 0.02 | 75.0  | 0.01 | 37.5  | 0.01 | 50.0  | RUMEN |
|                                        |      | RL | 0.07 | 100.0 | 0.06 | 100.0 | 0.06 | 100.0 | 0.07 | 100.0 | 0.05 | 87.5  | 0.07 | 100.0 |       |
|                                        |      | RS | 0.01 | 62.5  | 0.01 | 56.3  | 0.01 | 37.5  | 0.01 | 62.5  | 0.00 | 25.0  | 0.01 | 60.0  |       |
| Otu0056-Bibersteinia                   | 53.3 | BS | 1.17 | 83.3  | 2.55 | 87.5  | 1.52 | 100.0 | 1.55 | 87.5  | 0.93 | 87.5  | 8.06 | 100.0 | ORAL  |
|                                        |      | RL | 0.00 | 6.7   | 0.00 | 0.0   | 0.00 | 0.0   | 0.00 | 0.0   | 0.00 | 12.5  | 0.00 | 18.8  |       |
|                                        |      | RS | 0.00 | 0.0   | 0.00 | 0.0   | 0.00 | 0.0   | 0.00 | 0.0   | 0.00 | 6.3   | 0.00 | 6.7   |       |

|                    |      |    |      |       |      |       |      |       |      |       |      |       |      |       |       |
|--------------------|------|----|------|-------|------|-------|------|-------|------|-------|------|-------|------|-------|-------|
| Otu0788-           |      | BS | 0.00 | 0.0   | 0.00 | 0.0   | 0.00 | 0.0   | 0.00 | 25.0  | 0.00 | 12.5  | 0.00 | 25.0  | RUMEN |
| Rikenellaceae_RC9_ | 52.7 | RL | 0.03 | 86.7  | 0.03 | 87.5  | 0.04 | 87.5  | 0.03 | 87.5  | 0.03 | 87.5  | 0.03 | 62.5  |       |
| gut_group          |      | RS | 0.00 | 0.0   | 0.00 | 6.3   | 0.00 | 12.5  | 0.00 | 12.5  | 0.00 | 0.0   | 0.00 | 0.0   |       |
| Otu0356-           |      | BS | 0.01 | 33.3  | 0.00 | 12.5  | 0.00 | 12.5  | 0.01 | 37.5  | 0.01 | 25.0  | 0.01 | 50.0  | RUMEN |
| Rikenellaceae_RC9_ | 52.5 | RL | 0.09 | 100.0 | 0.09 | 100.0 | 0.13 | 100.0 | 0.11 | 100.0 | 0.09 | 100.0 | 0.07 | 87.5  |       |
| gut_group          |      | RS | 0.01 | 37.5  | 0.01 | 43.8  | 0.01 | 31.3  | 0.01 | 43.8  | 0.01 | 25.0  | 0.01 | 33.3  |       |
| Otu0120-           |      | BS | 0.07 | 100.0 | 0.02 | 50.0  | 0.00 | 0.0   | 0.05 | 75.0  | 0.02 | 37.5  | 0.03 | 50.0  | RUMEN |
| Succiniclasticum*  | 52.4 | RL | 0.18 | 100.0 | 0.20 | 100.0 | 0.22 | 100.0 | 0.19 | 100.0 | 0.17 | 100.0 | 0.26 | 100.0 |       |
|                    |      | RS | 0.16 | 100.0 | 0.15 | 100.0 | 0.15 | 100.0 | 0.12 | 100.0 | 0.15 | 100.0 | 0.17 | 100.0 |       |
| Otu0096-           |      | BS | 0.11 | 100.0 | 0.06 | 50.0  | 0.01 | 25.0  | 0.17 | 87.5  | 0.07 | 37.5  | 0.13 | 75.0  | RUMEN |
| Ruminococcus_1*    | 50.2 | RL | 0.05 | 93.3  | 0.04 | 75.0  | 0.01 | 50.0  | 0.04 | 100.0 | 0.04 | 81.3  | 0.09 | 93.8  |       |
|                    |      | RS | 0.40 | 100.0 | 0.44 | 100.0 | 0.36 | 100.0 | 0.24 | 100.0 | 0.32 | 100.0 | 0.38 | 100.0 |       |
| Otu0094-CPla-      |      | BS | 0.02 | 66.7  | 0.01 | 25.0  | 0.00 | 12.5  | 0.03 | 87.5  | 0.01 | 25.0  | 0.00 | 0.0   | RUMEN |
| 4_termite_group    | 49.7 | RL | 0.25 | 100.0 | 0.31 | 100.0 | 0.56 | 100.0 | 0.37 | 100.0 | 0.45 | 100.0 | 0.26 | 100.0 |       |
|                    |      | RS | 0.01 | 43.8  | 0.02 | 62.5  | 0.02 | 68.8  | 0.02 | 62.5  | 0.02 | 68.8  | 0.02 | 46.7  |       |

\*Taxa that varied with interaction of sampling time and sample type (Table S7); Importance and Prevalence are both expressed as percentages; <sup>1</sup>BS=

buccal swab, rumen samples were merged based on rumen content strata: RL=rumen liquids (RAL +RVL) and RS=rumen solids (RAS+RVS);

<sup>2</sup>average relative abundance; <sup>3</sup>average prevalence.

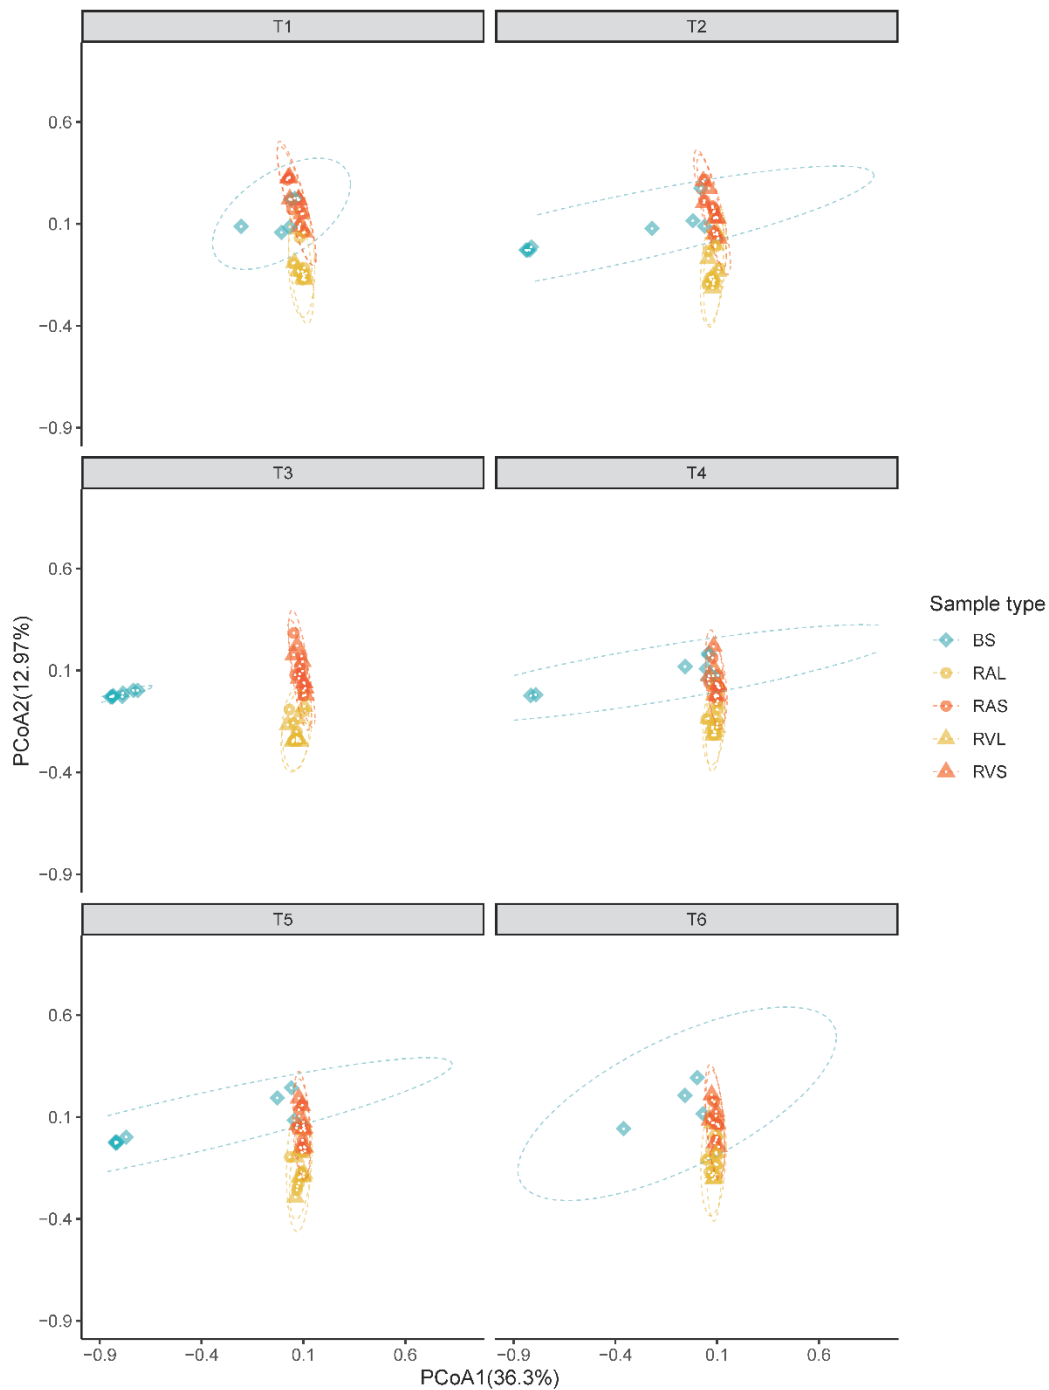

**FIG 1.** Principal coordinate analysis (PCoA) showing Bray-Curtis dissimilarities in the composition of bacterial communities between sample types within each sampling time. Individual points in each plot represent a dairy cow, different colors and shapes represent a sample type (BS: buccal swab, RAL: rumen anterior liquid, RAS: rumen anterior solid, RVL: rumen ventral liquid and RVS: rumen ventral solid), and each facet represents a time point (T1 to T6). Percentages showed along the axes represent, respectively, the proportion of dissimilarities captured by PCoA in 2D coordinate space.

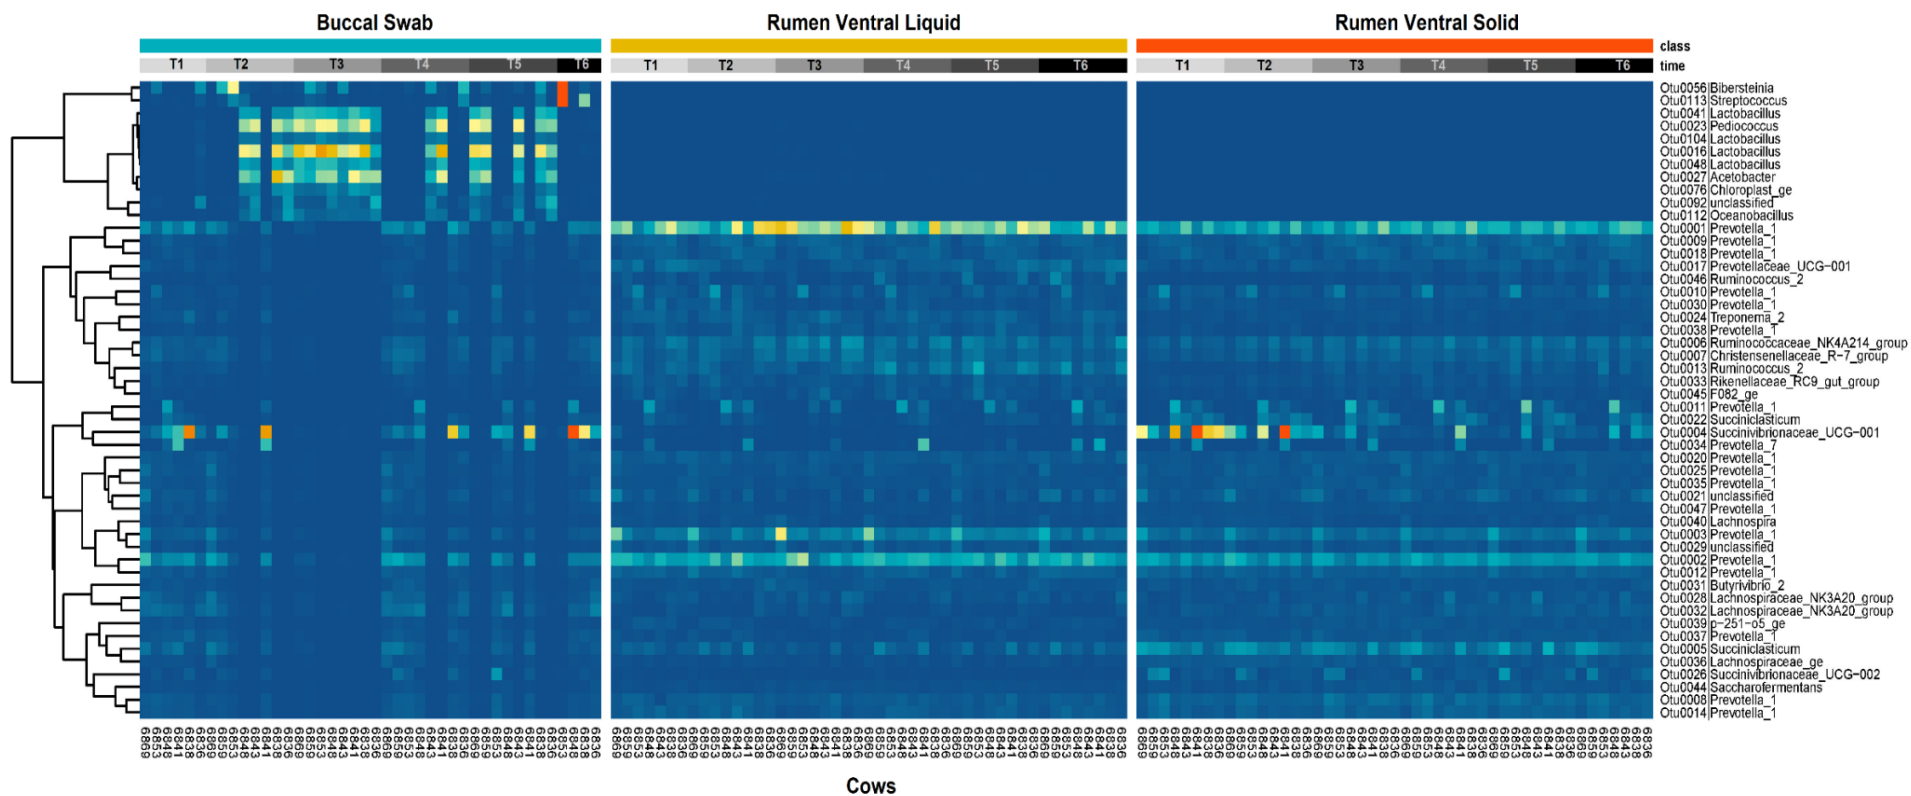

1

2 **FIG 2.** Distribution of the most abundant bacterial taxa among individual dairy cows according to sample type (BS: buccal swab, RVL:  
 3 rumen ventral liquid and RVS: rumen ventral solid) and sampling time (T1:T6). The color-key represents the relative abundance at  
 4 gradient of color from dark blue (low abundance) to dark orange (high abundance). The hierarchical dendrogram was established using  
 5 Pearson product-moment correlations as the distance measure and “complete” as a clustering method.

6



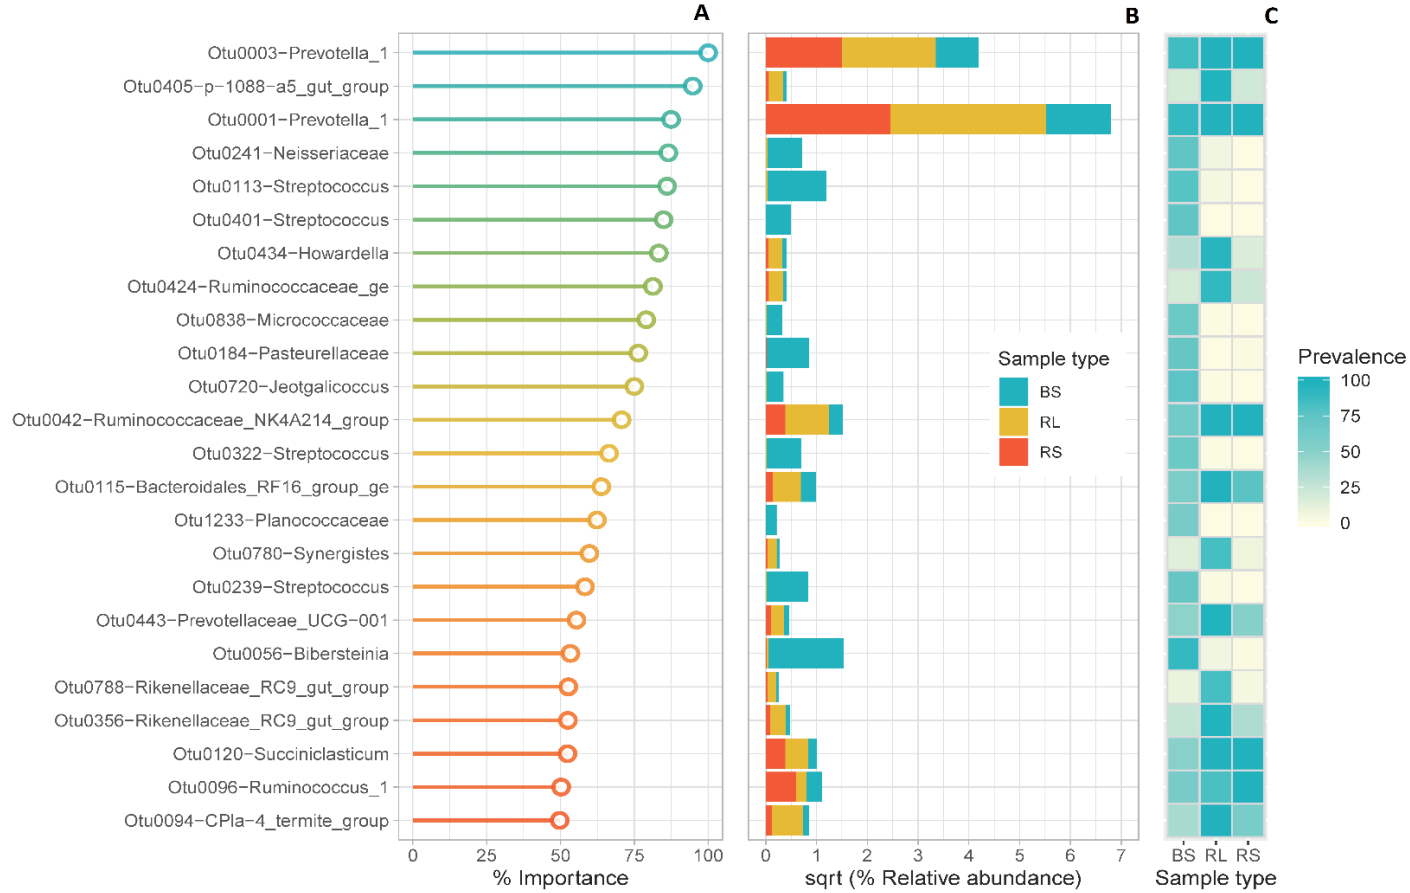

7

8 **FIG 3.** Variable importance (VIMP) plot from the random forest classifier. A) Lollipop chart showing the most important bacterial  
 9 signatures that displayed importance (% Mean Decrease in Gini $\geq$ 50) and that discriminate between buccal swab (BS), rumen liquids  
 10 (RL) and rumen solids (RS) samples. B) Bar-plots of sqrt-relative abundance of OTUs according to sample type; C) Heat map of  
 11 prevalence of OTUs in each sample type.

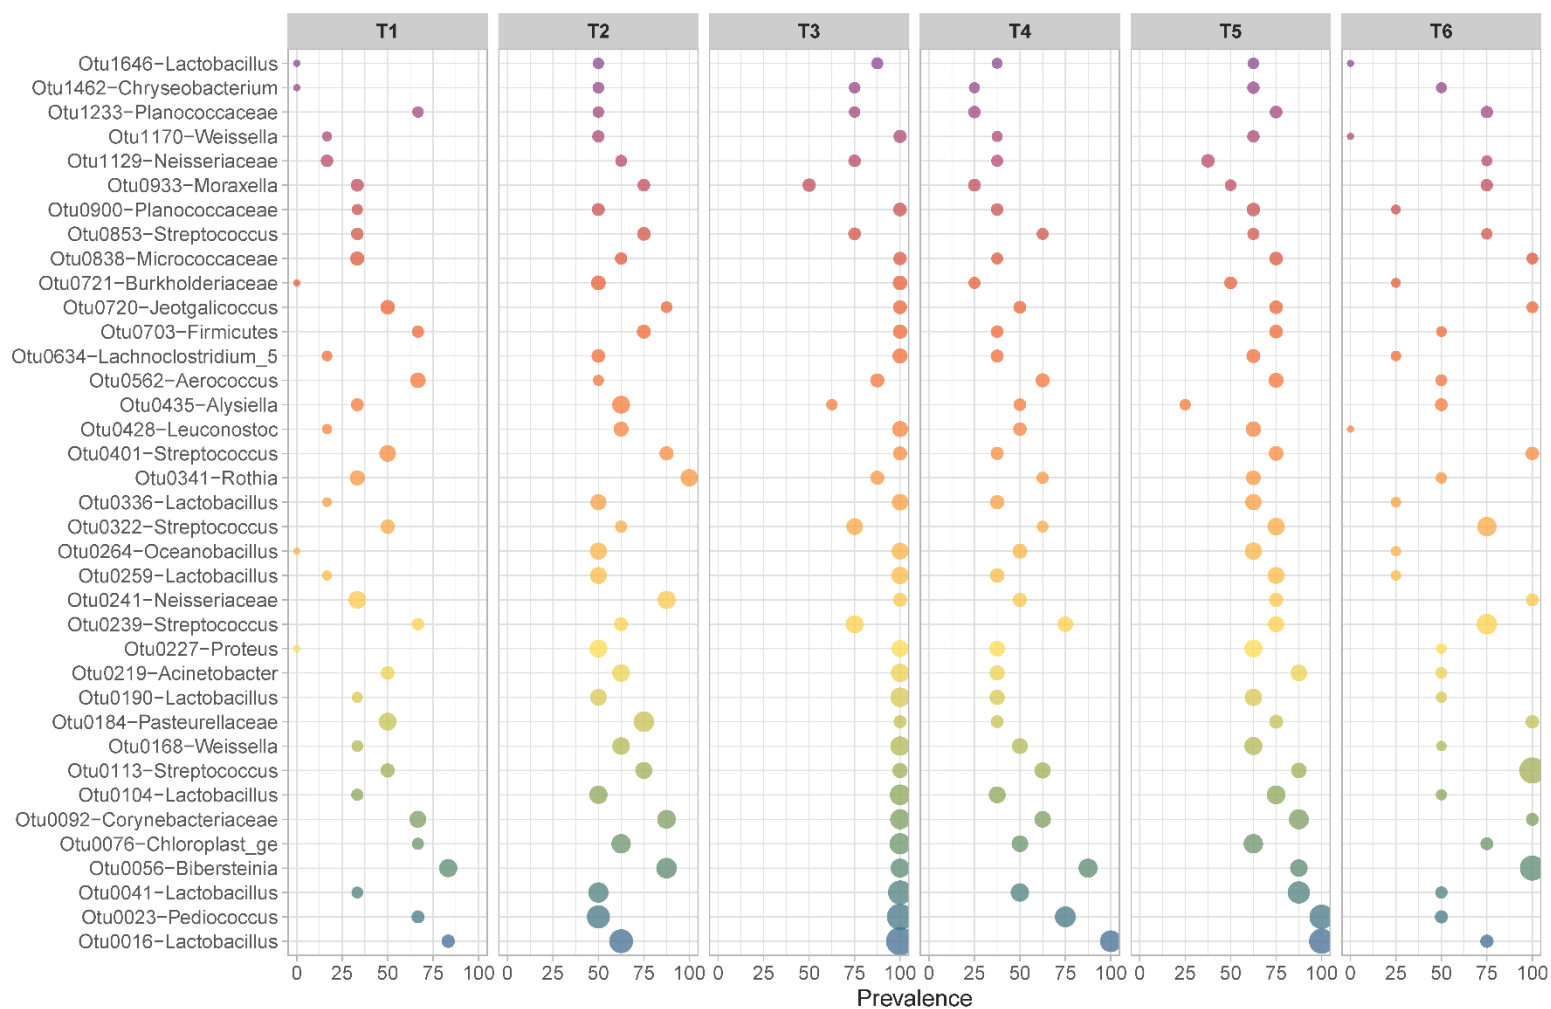

sqrt(Mean Relative Abundance) • 0 ● 1 ● 2 ● 3

12

13 **FIG 4.** Bubble chart showing the prevalence and relative abundance of the oral OTUs assigned to higher taxa (phylum, family or  
 14 genus level) according to sampling time (T1:T6).

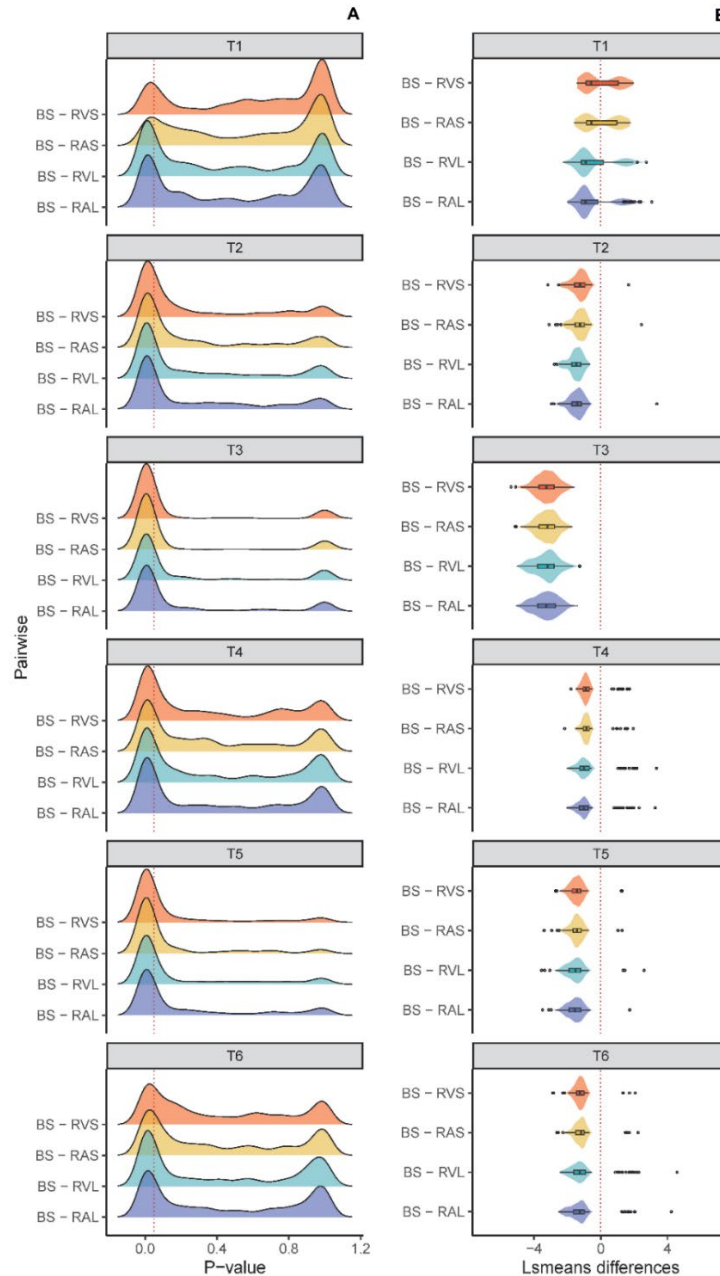

15

16 **FIG 5. A)** Ridgeline plots showing the distribution of bacterial OTUs whose abundance varied  
 17 significantly (red line =  $P\text{-value} \leq 0.05$ ) in pairwise comparisons between buccal swab (BS) and  
 18 all types of rumen samples (RAL, RVL, RAS, and RVS) within each sampling time (T1:T6). **B)**  
 19 Violin plot showing the Least Squares Means (LSmeans) differences of significant pairwise  
 20 comparisons (Tukey HSD  $\leq 0.05$ ) between buccal swab and all types of rumen samples within  
 21 each sampling time.

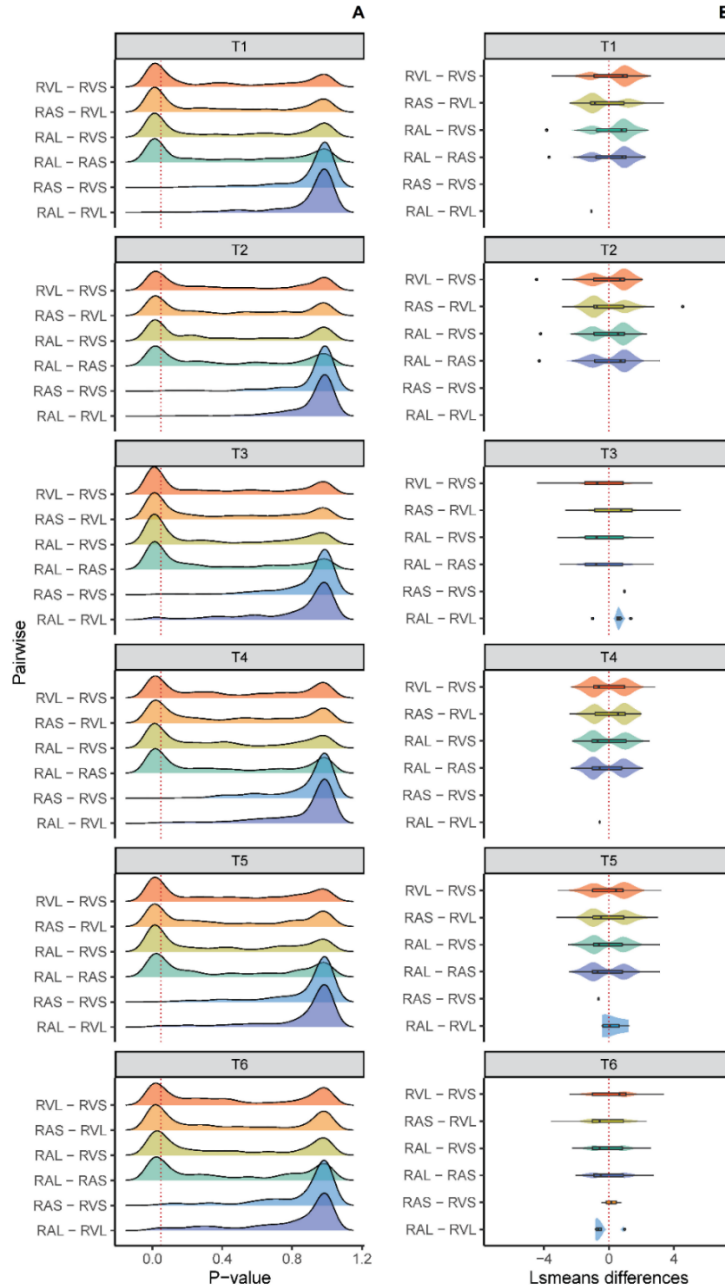

22

23 **FIG 6. A)** Ridgeline plot showing the distribution of bacterial OTUs whose abundance varied  
 24 significantly (red line= $P\text{-value} \leq 0.05$ ) in pairwise comparisons between all types of rumen samples  
 25 (RAL, RVL, RAS, and RVS) within each sampling time (T1:T6). **B)** Violin plot showing the Least  
 26 Square Means (LSMEANS) differences of significant pairwise comparisons (Tukey HSD  $\leq 0.05$ )  
 27 between all types of rumen samples within each sampling time.
